# Supplementary material for: Conformational transitions and helical structures of a dipolar chain in external electric fields
Source: Royal Society of Chemistry journal article supplement (doi:10.1039/d0sm01868f), 2020-12-08
Supplement: d0sm01868f1.pdf [file d0sm01868f1.pdf]

## Electronic Supporting Information:

### Conformational transitions and helical structures of a semiexible dipolar chain in external electric fields.

Yu. D. Gordievskaya<sup>\*,a,b</sup> and E. Yu. Kramarenko<sup>\*,a,b</sup>.

<sup>a</sup>*Faculty of Physics, Lomonosov Moscow State University, Leninskie gory, 1-2, 119991, Moscow, Russia*

<sup>b</sup>*A. N. Nesmeyanov Institute of Organoelement Compounds RAS, 119991, Moscow, Russia*

\*Corresponding author's emails: [gordievskaya@polly.phys.msu.ru](mailto:gordievskaya@polly.phys.msu.ru) (YDG) and [kram@polly.phys.msu.ru](mailto:kram@polly.phys.msu.ru) (EYK)

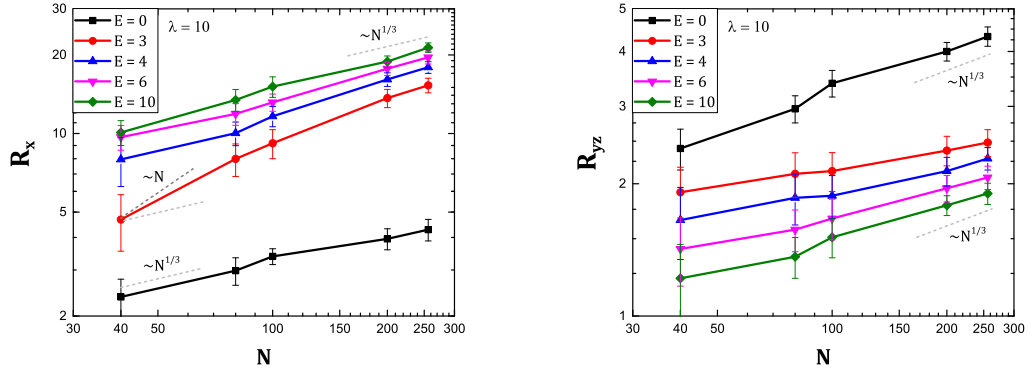

Figure S1. Dependences of  $R_x$  (left) and  $R_{yz}$  (right) on the chain length  $N$  for different  $E$  at  $\lambda = 10$ .

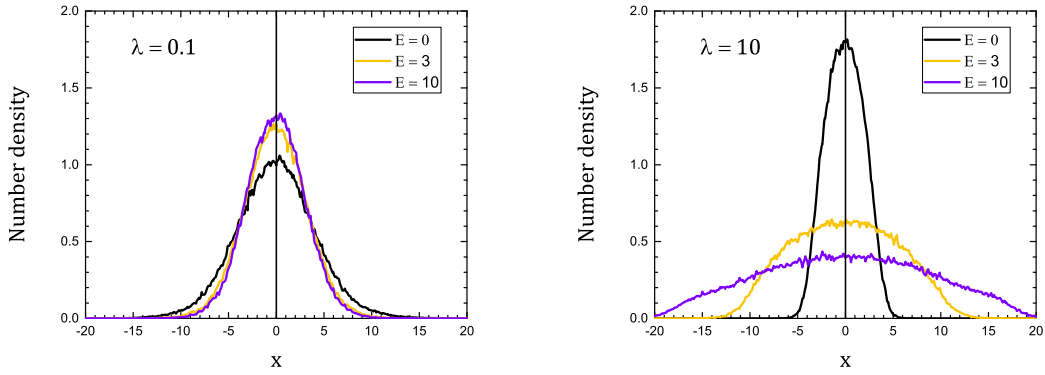

Figure S2. The number density of backbone beads of the dipolar chain along the X-axis under weak and strong electrostatic interactions,  $\lambda = 0.1$  and  $10$ , respectively. The coordinate  $x = 0$  is the center mass of the chain.

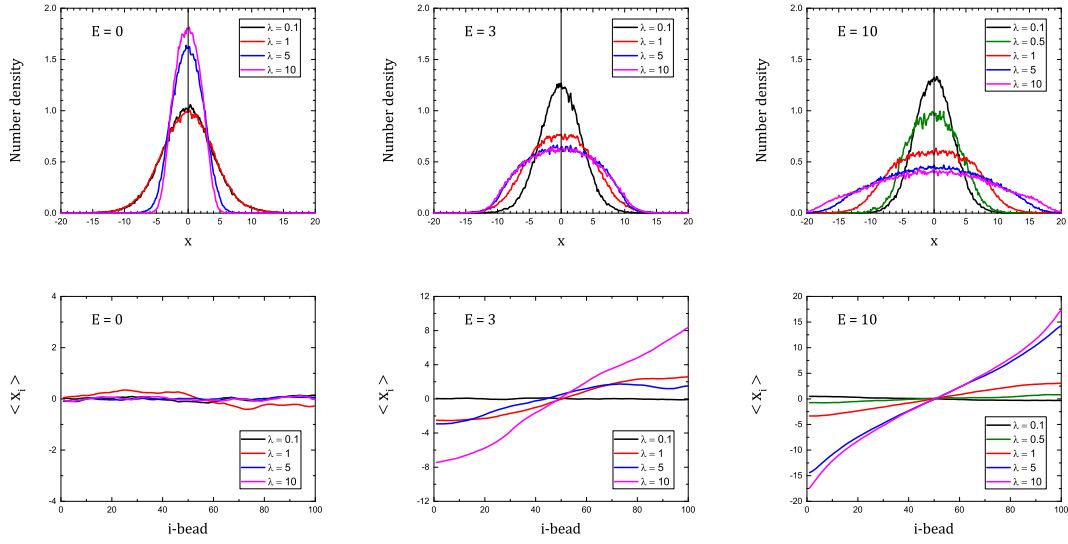

Figure S3. The number density of backbone beads of the dipolar chain along the X-axis (top) and the mean value of the x-coordinate of  $i$ -bead relative to the center of mass of the chain (bottom) for various  $\lambda$  at  $E = 0, 3$  and  $10$ .

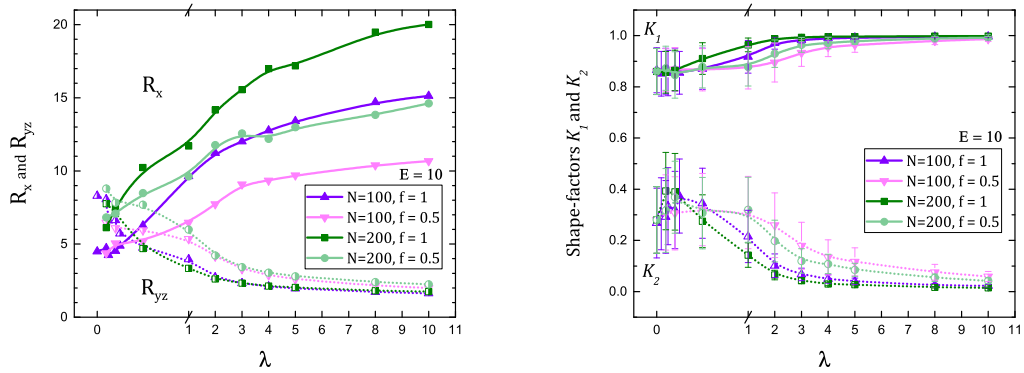

Figure S4. Dependences of  $R_x$  and  $R_{yz}$  (left) and shape-factors  $K_1$  and  $K_2$  (right) on  $\lambda$  for chain of different length ( $N = 100, 200$ ) and fraction of polar groups ( $f = 0.5, 1$ ) at  $E = 10$ .

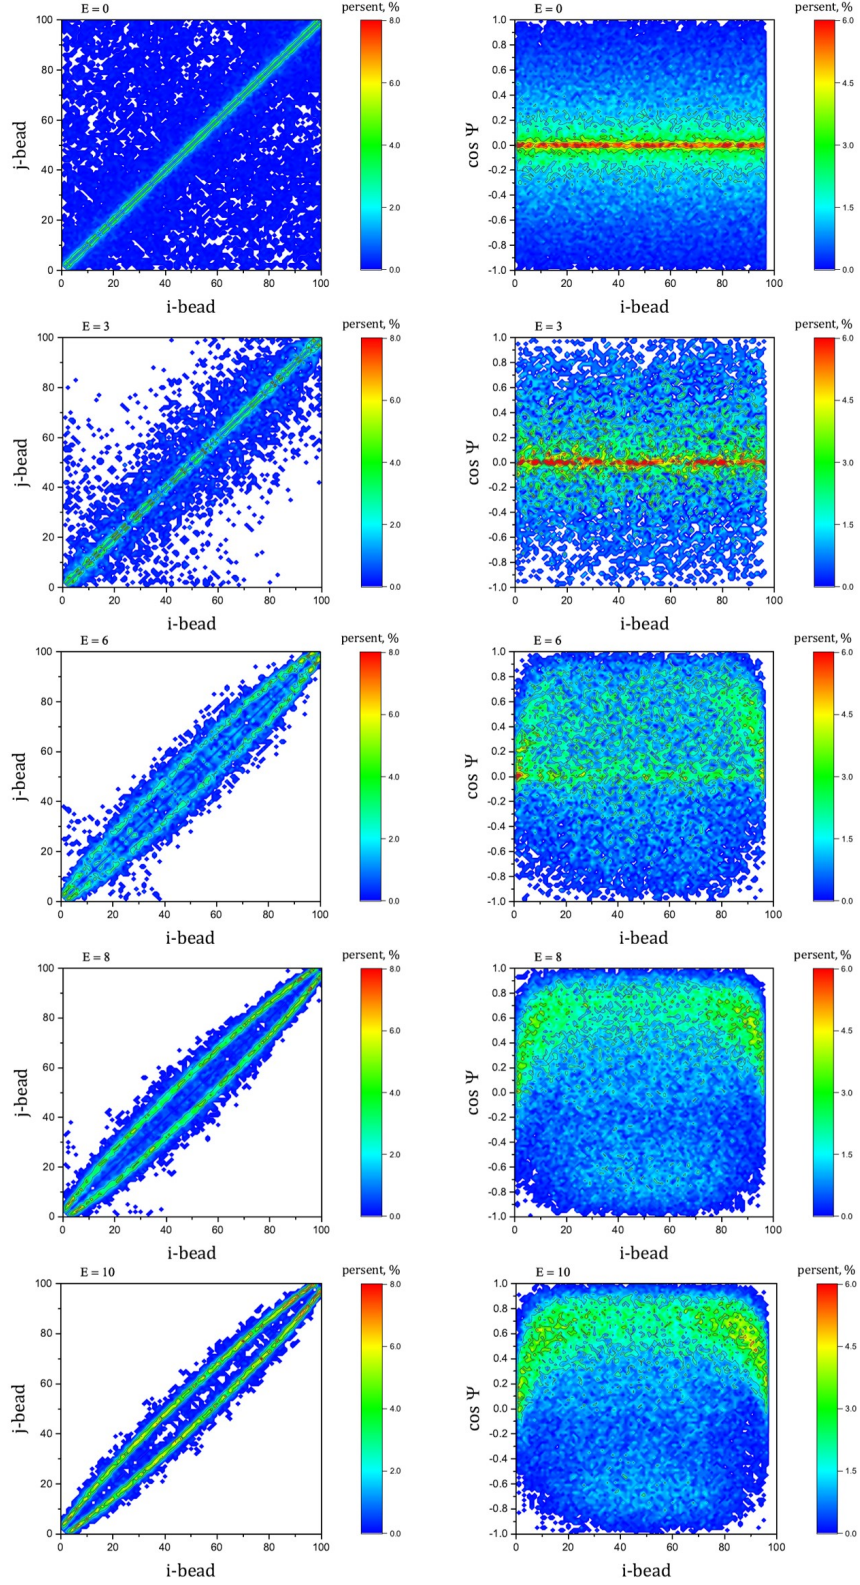

Figure S5. Contact maps and distributions of dihedral angles along the dipolar chain at  $\lambda = 10$  for various  $E = 0, 3, 6, 8$  and  $10$ .

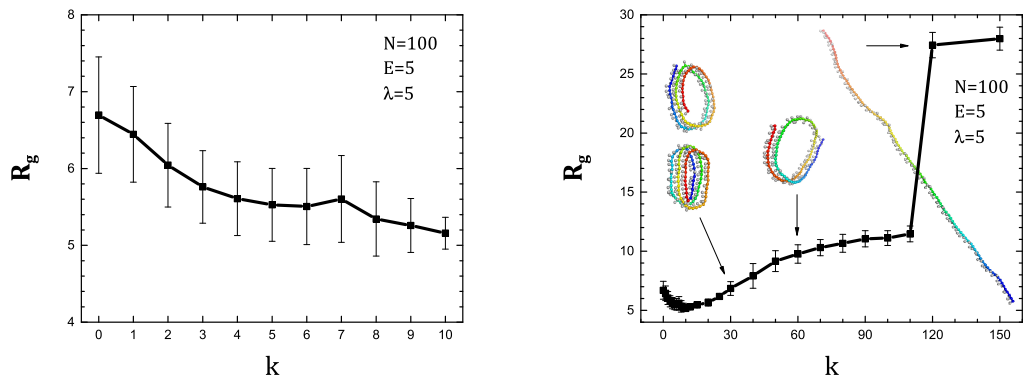

Figure S6. Dependences of  $R_g$  on the chain rigidity  $k$  at  $E = 5$  and  $\lambda = 5$ .

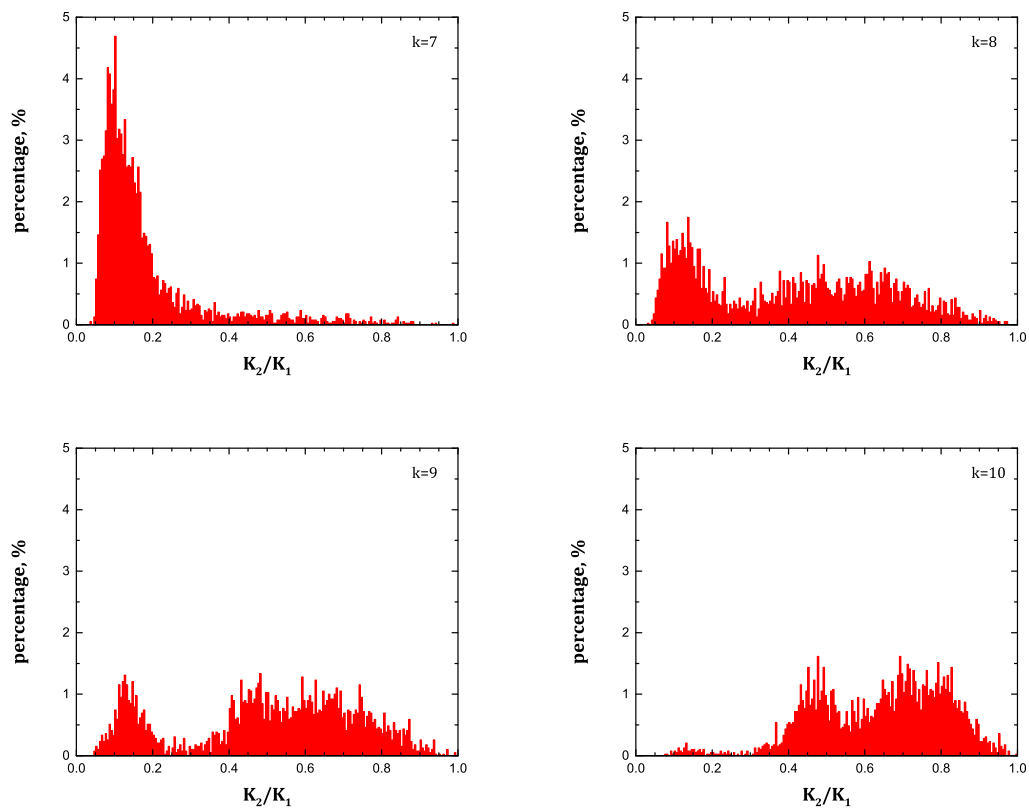

Figure S7.  $K_2/K_1$  distribution histogram for the dipolar chains of different rigidity  $k = 7 - 10$  at  $E = 5$  and  $\lambda = 5$
